# Supplementary material for: Protocol for a process evaluation of a stepped wedge randomised controlled trial to reduce unnecessary hospitalisations of older people from residential aged care: the EDDIE+ study
Source: PubMed Central journal article supplement — BMJ Open. 2023 Feb 16;13(2):e066857. doi: 10.1136/bmjopen-2022-066857 (PMC9936275; doi:10.1136/bmjopen-2022-066857), 2023-02-16
Supplement: bmjopen-2022-066857supp001.pdf [file bmjopen-2022-066857supp001.pdf]

**EDDIE+ Supplementary file** – examples of data collection tools

**S1:** Family member interview guide

**S2:** Stakeholder interview guide

**S3:** Family member or nominated advocate questionnaire

**S4:** Staff self-efficacy survey (RN, EN, PCW)

**S1: Family member interview guide**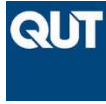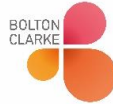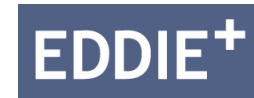**Family member interview example topic guide**

The following guide is intended to be used to conduct post implementation reviews of EDDIE+.

**Objective:**

Identify family or nominated advocate awareness and experience of the EDDIE+ program.

**Participants:**

Interviews will be held with family members or nominated advocate of residents.

Notes – might not be one episode of care – could be multiple within the intervention period.

**Introduction**

EDDIE+ is a research project that has been introduced at *RAC home name*. The purpose of this research project is to implement and evaluate a RAC home-driven hospital avoidance program that aims to upskill, empower and provide support for nursing and care staff to detect deterioration in elderly residents early, so that they can provide care in place (at *RAC home name*), avoid residents being transferred unnecessarily to hospital, and reduce hospital length of stay if patients are admitted.

**Questions**

- How did you find your experience with this program?
- What has changed in your life because of using this program?
- What would you tell a friend/family member about the program?

**S2: Stakeholder interview guide**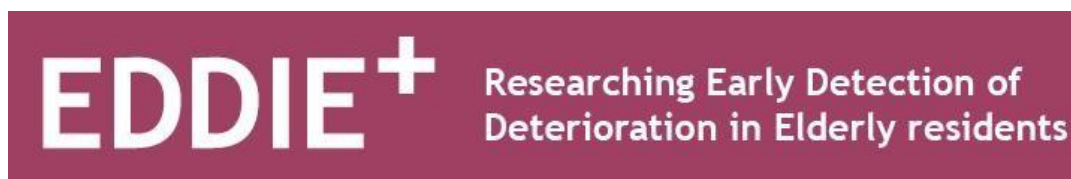**RAC stakeholder interview example topic guide**

The following guide is intended to be used to conduct post implementation reviews of EDDIE+.

**Objective:**

Identify factors that supported and barriers that impeded the implementation and success of the project, including factors that may be important for scale-up or adoption in other RAC homes.

**Participants:**

Interviews will be held with the following key groups as applicable:

- Nurses and carers
- Other RAC home stakeholders

The number and mix of groups will be dependent on the RAC home.

| Key topic                                                          | Prompt questions                                                                                                                                                                                                                                                                                                                                                                                             |
|--------------------------------------------------------------------|--------------------------------------------------------------------------------------------------------------------------------------------------------------------------------------------------------------------------------------------------------------------------------------------------------------------------------------------------------------------------------------------------------------|
| How was the intervention tailored and implemented?                 | <ol style="list-style-type: none"> <li>1. Can you describe how the intervention was implemented?</li> <li>2. Was the intervention implemented according to the implementation plan?</li> <li>3. Who were the key stakeholders to get on board with the intervention?</li> <li>4. To what extent were the needs and preferences of clients considered when deciding to implement the intervention?</li> </ol> |
| What about the intervention worked?                                | <ol style="list-style-type: none"> <li>1. What did you like about the program?</li> <li>2. What has been most helpful to you?</li> <li>3. What were implementation facilitators?</li> </ol>                                                                                                                                                                                                                  |
| What about the intervention didn't work?                           | <ol style="list-style-type: none"> <li>1. What didn't you like about the program?</li> <li>2. What has been least helpful to you?</li> </ol>                                                                                                                                                                                                                                                                 |
| What factors will be important for scale-up and/or sustainability? | <ol style="list-style-type: none"> <li>1. How do you think this would work in other RAC homes?</li> <li>2. What is important for this to work in other RAC homes?</li> </ol>                                                                                                                                                                                                                                 |
| Is EDDIE+ generalisable to other RAC home settings?                | <ol style="list-style-type: none"> <li>1. What would need to be considered?</li> </ol>                                                                                                                                                                                                                                                                                                                       |

**S3: Family member or nominated advocate questionnaire**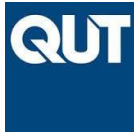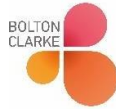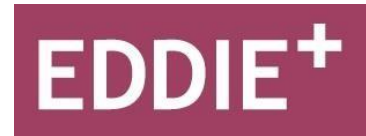**Researching Early Detection of Deterioration In  
Elderly residents****Family member or nominated advocate  
questionnaire**

This survey asks your opinions about the EDDIE+ program at Bolton Clarke and how you feel it has affected the care your family member has received. There are no right or wrong answers to these questions.

Please circle the face that most reflects how you feel about the following statements.

1. How did you find your experience with the EDDIE+ program?

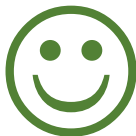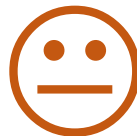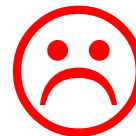

2. The EDDIE+ program impacted the care my loved one received in a good way.

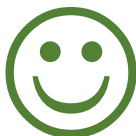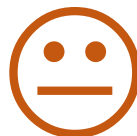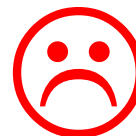

3. I think the EDDIE+ program should be introduced in other Residential Aged Care homes.

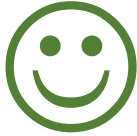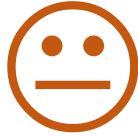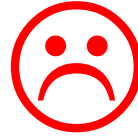

Thank you for completing this survey.

**S4: Staff self-efficacy survey (RN, EN, PCW)**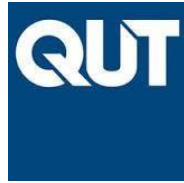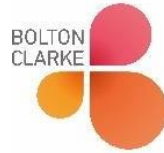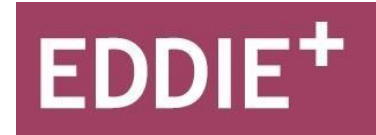**Researching Early Detection of Deterioration In  
Elderly residents****Nurse and carer questionnaire**

This survey will ask some general questions about you, as well as some questions about your role at Bolton Clarke. There are no right or wrong answers to these questions. All answers will remain confidential. Only the EDDIE+ team at the Queensland University of Technology (QUT) will see your answers.

It will take about 10 minutes to complete.

**Please do NOT complete this survey if you are under 18 years of age.**

We would like to ask you similar questions at the end of the EDDIE+ trial. To help us match your responses please make yourself a code. The code is unique to you and we cannot identify you in any way from this code.

Write the first 3 letters of your mother's surname? (e.g. Davis will be DAV)      ---

Write the numbers of your birth month      (e.g. February is 02)    --

**ABOUT YOU****First, please tell us a bit about yourself:**

1. Age \_\_\_\_\_ years
  
2. What best describes your gender?
  - Female
  - Male
  - Other (please specify) \_\_\_\_\_
  - Prefer not to say
  
3. What best describes your work role at Bolton Clark?
  - Registered nurse
  - Enrolled nurse
  - Personal care worker
  - Other (please specify) \_\_\_\_\_
  
4. How long have you cared for residents at Bolton Clarke? \_\_\_\_\_ years
  
5. How long have you cared for residents in a Residential Aged Care home? \_\_\_\_\_ years
  
6. What qualifications have you completed? *(tick all that apply)*
  - None
  - Registered nurse
  - Enrolled Nurse
  - Certificate III in Aged Care/Community Care, Disability or Individual Support
  - CHCCS305C – Assist clients with medication
  - First Aid/CPR certificate
  - Other certificate, not sure of name
  - Other (please specify) \_\_\_\_\_

### Job related self-efficacy

Please circle how much you agree or disagree with the following statements.

|                                                                      | Strongly disagree | Disagree | Neither agree nor disagree | Agree | Strongly agree |
|----------------------------------------------------------------------|-------------------|----------|----------------------------|-------|----------------|
| 1. I have confidence in my ability to do my job.                     | 1                 | 2        | 3                          | 4     | 5              |
| 2. There are some tasks required by my job that I cannot do well.    | 1                 | 2        | 3                          | 4     | 5              |
| 3. When my performance is poor, it is due to my lack of ability.     | 1                 | 2        | 3                          | 4     | 5              |
| 4. I doubt my ability to do my job.                                  | 1                 | 2        | 3                          | 4     | 5              |
| 5. I have all the skills needed to perform my job very well.         | 1                 | 2        | 3                          | 4     | 5              |
| 6. Most people in my line of work can do this job better than I can. | 1                 | 2        | 3                          | 4     | 5              |
| 7. I am an expert at my job.                                         | 1                 | 2        | 3                          | 4     | 5              |
| 8. My future in this job is limited because of my lack of skills.    | 1                 | 2        | 3                          | 4     | 5              |
| 9. I am very proud of my job skills and abilities.                   | 1                 | 2        | 3                          | 4     | 5              |
| 10. I feel threatened when others watch me work.                     | 1                 | 2        | 3                          | 4     | 5              |



|                                    |
|------------------------------------|
| <b>Group related self-efficacy</b> |
|------------------------------------|

Please circle how much you agree or disagree with the following statements.

|                                                                          | Strongly disagree | Disagree | Neither agree nor disagree | Agree | Strongly agree |
|--------------------------------------------------------------------------|-------------------|----------|----------------------------|-------|----------------|
| 1. The group I work with has above average ability.                      | 1                 | 2        | 3                          | 4     | 5              |
| 2. This group is poor compared to other groups doing similar work.       | 1                 | 2        | 3                          | 4     | 5              |
| 3. This group is not able to perform as well as it should.               | 1                 | 2        | 3                          | 4     | 5              |
| 4. The members of this group have excellent job skills.                  | 1                 | 2        | 3                          | 4     | 5              |
| 5. Some members of this group should be excluded due to lack of ability. | 1                 | 2        | 3                          | 4     | 5              |
| 6. This group is not very effective.                                     | 1                 | 2        | 3                          | 4     | 5              |
| 7. Some members in this group cannot do their tasks well.                | 1                 | 2        | 3                          | 4     | 5              |

*Thank you for completing this survey. Please return to the nurse educator or place it in the box provided.*
